# Supplementary material
Source: PubMed Central journal article supplement (PMC2944979)
Supplement: supp_mcq156_mcq156supp_table1.pdf [file supp_mcq156_mcq156supp_table1.pdf]

## SUPPLEMENTARY DATA

TABLE S1.  $\delta^{15}\text{N}$  and  $\delta^{13}\text{C}$  of fungi and plants growing at site A.

| Species                                                 | n | $\delta^{15}\text{N}$ (‰) |        | $\delta^{13}\text{C}$ (‰) |        |
|---------------------------------------------------------|---|---------------------------|--------|---------------------------|--------|
|                                                         |   | mean                      | s.e.   | mean                      | s.e.   |
| Plants                                                  |   |                           |        |                           |        |
| <i>Amphicarpaea bracteata</i> subsp. <i>edgeworthii</i> | 2 | -0.89                     | ± 0.07 | -33.76                    | ± 0.54 |
| <i>Arachniodes standishii</i>                           | 3 | -3.66                     | ± 0.17 | -31.09                    | ± 0.98 |
| <i>Ardisia japonica</i>                                 | 6 | -5.71                     | ± 0.2  | -33.22                    | ± 0.14 |
| <i>Arisaema aequinoctiale</i>                           | 4 | -4.79                     | ± 0.31 | -35.96                    | ± 0.38 |
| <i>Aucuba japonica</i>                                  | 3 | -4.12                     | ± 0.34 | -31.35                    | ± 0.35 |
| <i>Carex conica</i>                                     | 2 | -3.3                      | ± 0.37 | -32.35                    | ± 0.02 |
| <i>Carex siderosticta</i>                               | 3 | -4.22                     | ± 0.07 | -33.54                    | ± 0.14 |
| <i>Carpinus tschonoskii</i>                             | 3 | -3.04                     | ± 0.44 | -34.95                    | ± 0.57 |
| <i>Castanea crenata</i>                                 | 1 | -1.41                     |        | -29.03                    |        |
| <i>Castanopsis sieboldii</i>                            | 6 | -2.77                     | ± 0.47 | -32.29                    | ± 0.61 |
| <i>Cephalanthera erecta</i>                             | 3 | 3.52                      | ± 0.21 | -30.53                    | ± 0.3  |
| <i>Cephalotaxus harringtonia</i>                        | 2 | -3.64                     | ± 0.32 | -33.41                    | ± 0.1  |
| <i>Chamaecyparis obtusa</i>                             | 1 | -5.68                     |        | -29.45                    |        |
| <i>Cinnamomum tenuifolium</i>                           | 2 | -5.28                     | ± 0.7  | -33.27                    | ± 1.06 |
| <i>Cryptomeria japonica</i>                             | 1 | -2.01                     |        | -30.78                    |        |
| <i>Cymbidium goeringii</i>                              | 6 | 4.96                      | ± 0.91 | -28.65                    | ± 1.11 |
| <i>Cymbidium lancifolium</i>                            | 8 | 7.09                      | ± 0.32 | -28.65                    | ± 0.92 |
| <i>Cymbidium macrorhizon</i>                            | 4 | 9.06                      | ± 0.74 | -24                       | ± 0.15 |
| <i>Cyrtosia septentrionalis</i>                         | 1 | 1.12                      |        | -22.74                    |        |
| <i>Damnacanthus indicus</i>                             | 6 | -3.1                      | ± 0.42 | -33.52                    | ± 0.3  |
| <i>Dendropanax trifidus</i>                             | 3 | -5.73                     | ± 0.23 | -31.48                    | ± 1.19 |
| <i>Desmodium laxum</i>                                  | 1 | -1.63                     |        | -34.29                    |        |
| <i>Deutzia scabra</i>                                   | 1 | -3.5                      |        | -33.91                    |        |
| <i>Dioscorea japonica</i>                               | 1 | -4.32                     |        | -33.37                    |        |
| <i>Dryopteris pacifica</i>                              | 1 | -4.82                     |        | -30.08                    |        |

|                                                    |   |       |        |        |        |
|----------------------------------------------------|---|-------|--------|--------|--------|
| <i>Elaeagnus macrophylla</i>                       | 1 | -0.86 |        | -31.32 |        |
| <i>Eriobotrya japonica</i>                         | 1 | -4.82 |        | -31.33 |        |
| <i>Eurya japonica</i>                              | 4 | -2.79 | ± 0.47 | -33.04 | ± 0.18 |
| <i>Ficus erecta</i>                                | 3 | -3.41 | ± 0.76 | -34.29 | ± 0.22 |
| <i>Goodyera schlechtendaliana</i>                  | 1 | -3.4  |        | -33.58 |        |
| <i>Hedera rhombea</i>                              | 6 | -6.35 | ± 0.59 | -34.32 | ± 0.15 |
| <i>Ilex serrata</i> f. <i>argutidens</i>           | 3 | -3.26 | ± 1.17 | -31.92 | ± 0.12 |
| <i>Lecanorchis nigricans</i>                       | 3 | 12.41 | ± 0.59 | -25.07 | ± 0.06 |
| <i>Lilium auratum</i>                              | 1 | -2.49 |        | -32.32 |        |
| <i>Liparis nervosa</i>                             | 3 | -1.95 | ± 0.7  | -31.26 | ± 1    |
| <i>Lithocarpus edulis</i>                          | 6 | -3.24 | ± 0.39 | -32.96 | ± 0.42 |
| <i>Machilus thunbergii</i>                         | 2 | -2.65 | ± 0.08 | -32.98 | ± 0.18 |
| <i>Monotropa uniflora</i>                          | 3 | 9.21  | ± 0.07 | -26.11 | ± 0.11 |
| <i>Neolitsea sericea</i>                           | 2 | -4.01 | ± 0.94 | -32.9  | ± 0.22 |
| <i>Ophiopogon japonicus</i>                        | 5 | -4.11 | ± 0.48 | -32.39 | ± 0.49 |
| <i>Oplismenus undulatifolius</i>                   | 3 | -5.71 | ± 0.55 | -35.12 | ± 0.3  |
| <i>Padus grayana</i>                               | 1 | -4.05 |        | -31.59 |        |
| <i>Piper kadsura</i>                               | 3 | -3.85 | ± 0.32 | -34.41 | ± 0.25 |
| <i>Pleioblastus chino</i>                          | 6 | -3.2  | ± 0.39 | -33.62 | ± 0.28 |
| <i>Pteris cretica</i>                              | 1 | -4.17 |        | -34.56 |        |
| <i>Smilax china</i>                                | 1 | -0.25 |        | -32.8  |        |
| <i>Stegnogramma pozoi</i> subsp. <i>mollissima</i> | 3 | -3.76 | ± 0.4  | -32.85 | ± 0.33 |
| <i>Trachelospermum asiaticum</i>                   | 6 | -4.85 | ± 0.54 | -32.67 | ± 0.86 |
| <i>Wisteria floribunda</i>                         | 1 | -2.48 |        | -29.18 |        |
| <i>Zeuxine agyokuana</i>                           | 1 | -0.55 |        | -32.11 |        |
| Fungi                                              |   |       |        |        |        |
| Amanita #1                                         | 1 | 3.1   |        | -26.4  |        |
| Lactarius #1                                       | 2 | 1.85  | ± 0.35 | -26.45 | ± 0.85 |
| Russula #1                                         | 1 | 2.2   |        | -27.3  |        |
| Russula #2                                         | 1 | 2.7   |        | -25.9  |        |

|                |   |     |           |       |            |
|----------------|---|-----|-----------|-------|------------|
| Russula #3 *   | 2 | 1.5 | $\pm 0.4$ | -28   | $\pm 0.05$ |
| Unknown sp. #1 | 1 | 1.9 |           | -23.5 |            |

---

\* Genbank accession number for ITS sequence: GQ359817.
