# Supplementary material
Source: PubMed Central journal article supplement (PMC2944979)
Supplement: supp_mcq156_mcq156supp_table2.pdf [file supp_mcq156_mcq156supp_table2.pdf]

## SUPPLEMENTARY DATA

TABLE S2.  $\delta^{15}\text{N}$  and  $\delta^{13}\text{C}$  of fungi and plants growing at site B.

| Species                          | <i>n</i> | $\delta^{15}\text{N}$ (‰) |        | $\delta^{13}\text{C}$ (‰) |        |
|----------------------------------|----------|---------------------------|--------|---------------------------|--------|
|                                  |          | mean                      | s.e.   | mean                      | s.e.   |
| Plants                           |          |                           |        |                           |        |
| <i>Aphananthe aspera</i>         | 3        | -1.82                     | ± 0.86 | -34.1                     | ± 0.78 |
| <i>Ardisia crenata</i>           | 1        | -3.46                     |        | -33.11                    |        |
| <i>Cymbidium goeringii</i>       | 3        | 3.69                      | ± 0.59 | -30.53                    | ± 0.77 |
| <i>Cymbidium macrorhizon</i>     | 2        | 7.24                      | ± 0.65 | -23.56                    | ± 1.04 |
| <i>Cymbidium aberrans</i>        | 3        | 10.92                     | ± 0.92 | -23.39                    | ± 0.36 |
| <i>Dioscorea japonica</i>        | 1        | -7.67                     |        | -33.83                    |        |
| <i>Ilex crenata</i>              | 1        | -4.6                      |        | -31.53                    |        |
| <i>Ligustrum lucidum</i>         | 2        | -3.96                     | ± 0.06 | -34.33                    | ± 0.65 |
| <i>Oplismenus undulatifolius</i> | 1        | -6.1                      |        | -39.18                    |        |
| <i>Pleioblastus chino</i>        | 2        | -2.29                     | ± 1.02 | -33.11                    | ± 0.92 |
| Fungi                            |          |                           |        |                           |        |
| <i>Amanita</i> #2                | 1        | 4.61                      |        | -24.92                    |        |
| <i>Amanita</i> #3                | 1        | 3.48                      |        | -25.38                    |        |
| <i>Boletus</i> #1                | 1        | 3.85                      |        | -25.85                    |        |
| <i>Russula</i> #4 *              | 1        | 5.97                      |        | -25.19                    |        |
| <i>Russula</i> #5 **             | 1        | 2.29                      |        | -25                       |        |
| <i>Russula</i> #6 ***            | 2        | 3.92                      | ± 0.88 | -26.26                    | ± 0.22 |
| <i>Russula</i> #7 ****           | 1        | 4.37                      |        | -26.17                    |        |

\* Genbank accession number for ITS sequence: GQ359818.

\*\* Genbank accession number for ITS sequence: GQ359819.

\*\*\* Genbank accession number for ITS sequence: GQ359820.

\*\*\*\* Genbank accession number for ITS sequence: GQ359821.
